# Supplementary material for: A Meta-Analysis on the Impact of High BMI in Patients Undergoing Transcatheter Aortic Valve Replacement
Source: MDPI journal article supplement (doi:10.3390/jcdd9110386), 2022-11-09

**Supplemental Table S2.** Meta-regression analyses for primary outcomes in normal BMI versus patients with overweight and obesity

|                           | NI vs OW             |         |                     |         | NI vs OB             |         |                     |         |
|---------------------------|----------------------|---------|---------------------|---------|----------------------|---------|---------------------|---------|
|                           | Thirty-day mortality |         | Long-term mortality |         | Thirty-day mortality |         | Long-term mortality |         |
|                           | beta                 | p-value | beta                | p-value | beta                 | p-value | beta                | p-value |
| <b>Age</b>                | 0.0043               | 0.97    | 0.0255              | 0.88    | -0.0392              | 0.78    | -0.1569             | 0.54    |
| <b>Male</b>               | 0.0004               | 0.80    | 0.0018              | 0.88    | -0.0007              | 0.71    | -0.111              | 0.54    |
| <b>BMI</b>                | 0.1834               | 0.68    | -                   | -       | -0.436               | 0.47    | -                   | -       |
| <b>AF</b>                 | 0.0038               | 0.39    | 0.0016              | 0.88    | -0.0053              | 0.44    | -0.0096             | 0.54    |
| <b>CAD</b>                | 0.0026               | 0.22    | -                   | -       | -0.0026              | 0.43    | -                   | -       |
| <b>COPD</b>               | -0.0004              | 0.83    | 0.0042              | 0.91    | -0.0004              | 0.88    | -0.0257             | 0.54    |
| <b>DM</b>                 | 0.00008              | 0.98    | 0.0153              | 0.89    | -0.002               | 0.68    | -0.0941             | 0.54    |
| <b>Dyslipidemia</b>       | -0.0001              | 0.99    | -                   | -       | -0.0051              | 0.62    | -                   | -       |
| <b>HTN</b>                | 0.0008               | 0.56    | -                   | -       | -0.0008              | 0.63    | -                   | -       |
| <b>GFR</b>                | -0.0407              | 0.36    | -0.0064             | 0.88    | -0.0036              | 0.95    | 0.0392              | 0.65    |
| <b>logistic EuroSCORE</b> | -0.0414              | 0.26    | -                   | -       | 0.0088               | 0.87    | -                   | -       |
| <b>STS score</b>          | 0.4026               | 0.26    | 0.051               | 0.88    | -0.148               | 0.81    | -0.3138             | 0.54    |

NI: normal BMI; OW: overweight; OB: obesity; BMI: body mass index; AF: atrial fibrillation; CAD: coronary artery disease; CKD: chronic kidney disease; COPD: chronic obstructive disease; DM: diabetes mellitus; HTN: hypertension; GFR: glomerular filtration rate; EuroSCORE: European System for Cardiac Operative Risk Evaluation; STS: Society of Thoracic Surgeons

**Supplemental Figure S1.** Funnel plots for mortality outcomes in normal BMI (NI) versus patients with overweight (OW). Hazard ratios (HR) (A) and odd ratios (OR) (B) of thirty-day mortality; HR (C) and OR (D) of long-term mortality.

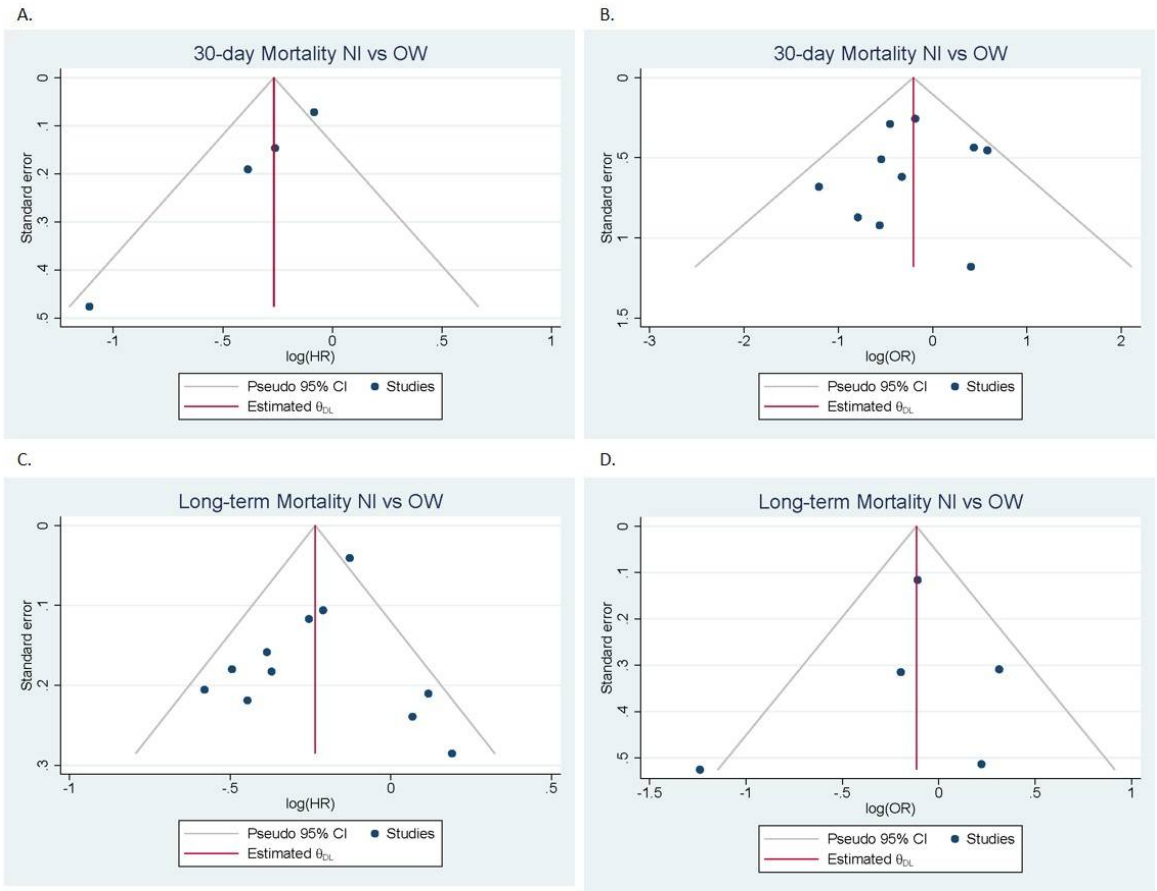

**Supplemental Figure S2.** Funnel plots for mortality outcomes in normal BMI (NI) versus patients with obesity (OB). Hazard ratios (HR) (A) and odd ratios (OR) (B) of thirty-day mortality; HR (C) and OR (D) of long-term mortality.

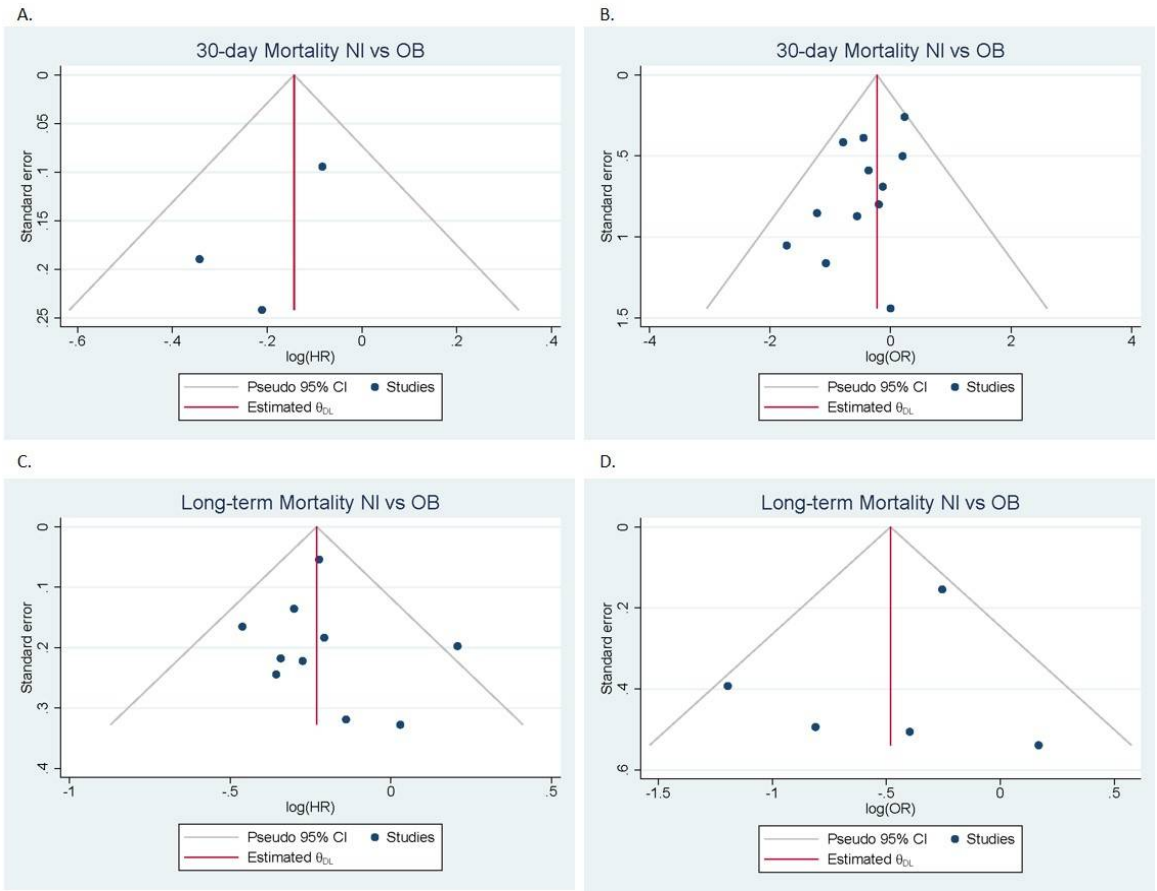

Supplement: s1 [file s1]
