# Supplementary material for: A Meta-Analysis on the Impact of High BMI in Patients Undergoing Transcatheter Aortic Valve Replacement
Source: MDPI journal article supplement (doi:10.3390/jcdd9110386), 2022-11-09
Supplement: s1 [file s1]

**Supplemental Table S1.** Newcastle-Ottawa scale

| Study (Study, Year)                 | Representativeness of OW and OB | Selection of NI | Ascertainment of Exposure | Demonstration of outcome of interest | Comparability | Assessment of outcome | Long enough follow-up | Adequacy of follow-up | Total Score |
|-------------------------------------|---------------------------------|-----------------|---------------------------|--------------------------------------|---------------|-----------------------|-----------------------|-----------------------|-------------|
| Abawi et al., 2017 [24]             | 1                               | 1               | 1                         | 1                                    | 2             | 1                     | 1                     | 0                     | 8           |
| Abramowitz et al., 2016 [9]         | 1                               | 1               | 1                         | 1                                    | 1             | 1                     | 1                     | 0                     | 7           |
| Ahmad et al., 2019 [25]             | 1                               | 1               | 1                         | 1                                    | 2             | 1                     | 0                     | 1                     | 8           |
| Berti et al., 2021 [22]             | 1                               | 1               | 1                         | 1                                    | 2             | 1                     | 0                     | 0                     | 7           |
| Boukhris et al., 2021 [12]          | 1                               | 1               | 1                         | 1                                    | 2             | 1                     | 1                     | 0                     | 8           |
| Corcione et al., 2021 [23]          | 1                               | 1               | 1                         | 1                                    | 2             | 1                     | 1                     | 1                     | 9           |
| De Marzo et al., 2021 [26]          | 1                               | 1               | 1                         | 1                                    | 2             | 1                     | 1                     | 0                     | 8           |
| De Palma et al., 2018 [27]          | 1                               | 1               | 1                         | 1                                    | 2             | 1                     | 1                     | 0                     | 8           |
| Gonska et al., 2021 [28]            | 1                               | 1               | 1                         | 1                                    | 2             | 1                     | 0                     | 1                     | 8           |
| Gonzalez-Ferreiro et al., 2017 [29] | 1                               | 1               | 1                         | 1                                    | 2             | 1                     | 1                     | 0                     | 8           |
| Kische et al., 2016 [30]            | 1                               | 1               | 1                         | 1                                    | 1             | 1                     | 1                     | 0                     | 7           |
| Koifman et al., 2016 [31]           | 1                               | 1               | 1                         | 1                                    | 2             | 1                     | 1                     | 0                     | 8           |
| Konigstein et al., 2015 [32]        | 1                               | 1               | 1                         | 1                                    | 2             | 1                     | 1                     | 0                     | 8           |
| Lung et al., 2014 [33]              | 1                               | 1               | 1                         | 1                                    | 1             | 1                     | 0                     | 1                     | 7           |
| Luo et al., 2022 [34]               | 1                               | 1               | 1                         | 1                                    | 2             | 1                     | 1                     | 0                     | 8           |
| McInerney et al., 2021 [10]         | 1                               | 1               | 1                         | 1                                    | 2             | 1                     | 1                     | 0                     | 8           |
| Om et al., 2019 [35]                | 1                               | 1               | 1                         | 1                                    | 2             | 1                     | 1                     | 0                     | 8           |
| Owais et al., 2020 [36]             | 1                               | 1               | 1                         | 1                                    | 2             | 1                     | 1                     | 0                     | 8           |
| Quine et al., 2020 [37]             | 1                               | 1               | 1                         | 1                                    | 2             | 1                     | 1                     | 0                     | 8           |
| Saji et al., 2022 [38]              | 1                               | 1               | 1                         | 1                                    | 2             | 1                     | 0                     | 0                     | 7           |
| Salizzoni et al., 2016 [39]         | 1                               | 1               | 1                         | 1                                    | 2             | 1                     | 1                     | 1                     | 9           |
| Sgura et al., 2022 [40]             | 1                               | 1               | 1                         | 1                                    | 2             | 1                     | 1                     | 0                     | 8           |

|                                      |   |   |   |   |   |   |   |   |   |
|--------------------------------------|---|---|---|---|---|---|---|---|---|
| Sharma et al.,<br>2020 [41]          | 1 | 1 | 1 | 1 | 1 | 1 | 1 | 0 | 8 |
| Tokarek et al.,<br>2019 [7]          | 1 | 1 | 1 | 1 | 2 | 1 | 1 | 0 | 8 |
| Van der Boon<br>et al., 2013<br>[42] | 1 | 1 | 1 | 1 | 2 | 1 | 1 | 1 | 9 |
| Yamamoto et<br>al., 2013 [43]        | 1 | 1 | 1 | 1 | 2 | 1 | 1 | 0 | 8 |

Note: OW: overweight; OB: obesity; NI: normal BMI group.
